# Supplementary material
Source: PubMed Central journal article supplement (PMC4287193)
Supplement: Supp_Figure1.pdf [file Supp_Figure1.pdf]

## Supplementary Data

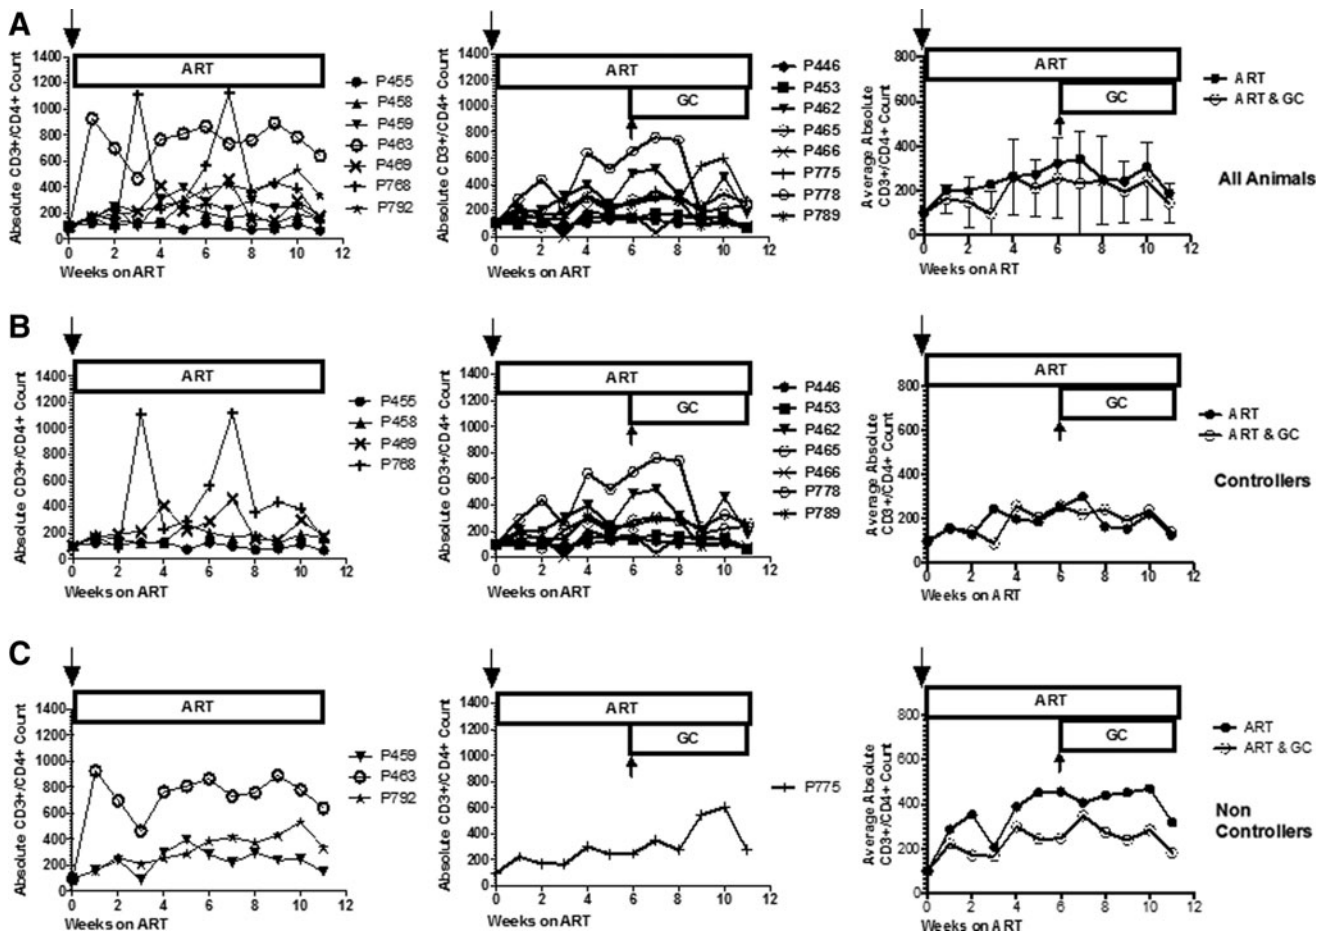

**SUPPLEMENTARY FIG. S1.** Absolute blood CD4<sup>+</sup> counts. (A–C) Absolute CD4<sup>+</sup> T cells were measured in the blood of animals treated with ART for 11 weeks (left) compared to animals treated with ART for 11 weeks and concurrently treated with GC for 6 weeks (center). Geometric mean analysis is shown for a comparison between animals treated with ART only and animals treated with GC and ART (right). Data are shown as all animals (A), animals with viral RNA levels below the detectable limits (<50 copies/ml), thus termed controllers (B), and animals that demonstrated viral RNA levels above the detectable limits (>50 copies/ml), thus termed noncontrollers (C).
