# Supplementary material
Source: PubMed Central journal article supplement (PMC4287193)
Supplement: Supp_Figure2.pdf [file Supp_Figure2.pdf]

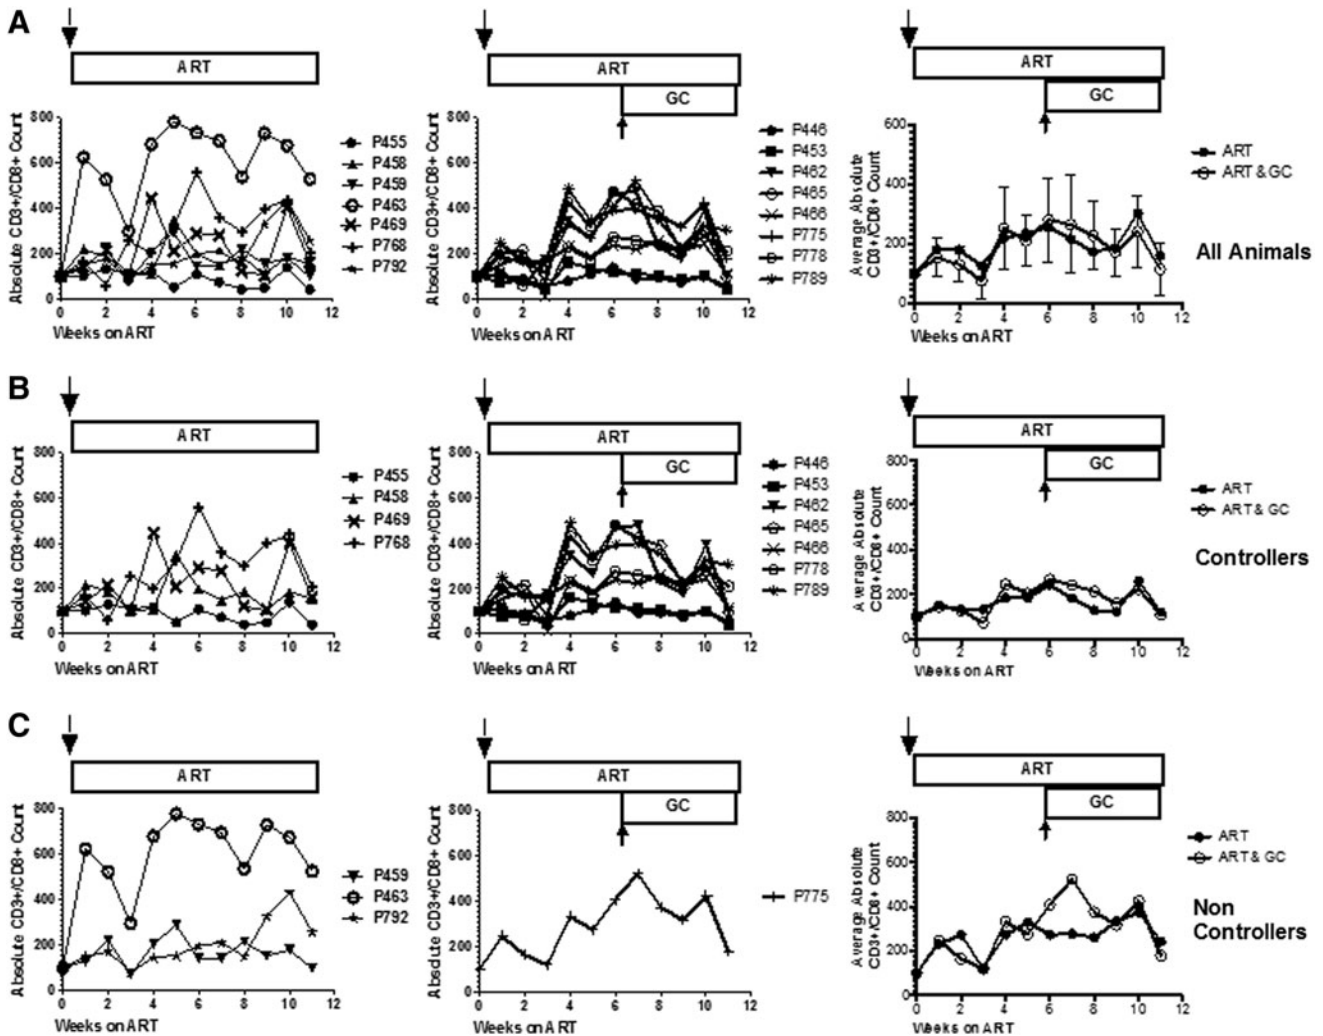

**SUPPLEMENTARY FIG. S2.** Absolute blood CD8<sup>+</sup> counts. (A–C) Absolute CD8<sup>+</sup> T cells were measured in the blood of animals treated ART for 11 weeks (left) compared to animals treated with ART for 11 weeks and concurrently treated with GC for 6 weeks (center). Geometric mean analysis is shown for a comparison between animals treated with ART only and animals treated with GC and ART (right). Data are shown as all animals (Supplementary Fig. S1A), animals with viral RNA levels below the detectable limits (<50 copies/ml), thus termed controllers (Supplementary Fig. S1B), and animals that demonstrated viral RNA levels above the detectable limits (>50 copies/ml), thus termed noncontrollers (Supplementary Fig. S1C).
